# Supplementary material
Source: PubMed Central journal article supplement (PMC4577388)
Supplement: supp_pp.15.00367_PP2015-00367R1_Supplemental_Material.pdf [file supp_pp.15.00367_PP2015-00367R1_Supplemental_Material.pdf]

AtBRI1 1 ---MKTFSFFLSVTTLFFFSFF-SLSFQASPSQSLYREIHQLISFK--DVLDPKN-LLP  
 AtBRL1 1 ---MKQRWLLVLIICFFTTSLV--MGIHGKHLINDDFNETALLLAFKQNSVKS DPNNVVG  
 AtBRL2 1 MTTSPIRVIRIRTRIQISFIFLLTHLSQSSSSDQSSLKTDLSLSLSFK-TMIQDDPNNILS  
 AtBRL3 1 ---MKQQWQF-LIILCLLVFLT--VDSRGRRLSDDVNDTALITAFKQTSIKSDPTNFLG  
 OsBRI1 1 ---MDSLWAAIAALFVAAA VVR-GAAAAD-----DAQLLEEFR--QAVPNOA-ALK  
 OsBRL1 1 ---MAASPPFMAAAFLT LVV--VLFRAPAPAI VGEAAAALLAFRRASVADDPDGALA  
 OsBRL2 1 -----MDIL-IPLILSSIYVSSS-AAAETDAAALLRFK-AFVHKDPRGVLS  
 OsBRL3 1 ---MAAVRVVAPAPSVLLLVAAAVLLHLARAIAGAADA EAAALLAFKDA SVAADDPGGALA  
 ZmBRI1a 1 ---MESPGLVLVA VVALFVVVVA-ATASGD-----DAQLLEQFK--EAVPSQAPDLR  
 ZmBRI1b 1 ---MESPG--LFAVVALFVVVVA-AAAAD-----DAQLLEQFK--EAVPSQATDLR  
 ZmBRL1 1 ---MAASTTSAAWFFVAVVLL---VLLHATAAAIAGAE EAAALLAFRRASVADDPRGALS  
 ZmBRL2 1 -----MDMLNLLLLVSSIYTSLAFT PVAATDADALLRFK-ASIQKDPGGVLS  
 ZmBRL3 1 ---MGAARTAAPVFM LLLH-----LSPRAVAAGTGDEAAAALLAFKRASVAADQAGRLA

AtBRI1 54 DWSSNKN-----PCTFDGVTCRD---DKVTSIDLSSKPLNVGFSAVSSSLLSLTGLES  
 AtBRL1 56 NWKYESG---RGSCSWRGVSCSD--DGRIVGLDLRNSGLTGTLN--LVNLTALPNLQNL  
 AtBRL2 60 NWSPRKS-----PCQFSGVTCL---GGRVTEINLSG-SGLSG-IVSFNAFTSLDSLSVL  
 AtBRL3 55 NWRYGSG---RDPCTWRGVSCSS--DGRVIGDLRNGGLTGTLN--LNNLTALS NLRSL  
 OsBRI1 46 GWSGGDG-----ACRFPGAGCRN---GRLTSLSLAGVPLNAEFRAVAATLLQLGSVEVL  
 OsBRL1 55 SWVLGAGGANSTAPCSWDGVSCAPPPDGRVAAVDLSGMSLAGELR--LDALLALPALQRL  
 OsBRL2 45 SWVDPG-----PCRWRGVTCN--GDGRVTELDLAA-GGLAG-RAELAALSGLDTLCRL  
 OsBRL3 58 GWAN-STTPG--SPCAWAGVSCAA---GRVRALDLSGMSLSGRLR--LDALLALSALRRL  
 ZmBRI1a 48 GWSASDG-----ACRFPGAGCRG---GRLTSLSLAAVPLNADFRAVAATLLQLSSLET  
 ZmBRI1b 44 GWSASDG-----ACRFPGAGCRG---GRLTSLSLAAVPLNADFRAVAATLLQLASLET  
 ZmBRL1 55 GWAQAN--ATASAPCSWAGVSCAPQPDGRVVAVNLSGMALVGE LR--LDALLALPALQRL  
 ZmBRL2 47 SWQPSGSD----GPCNWHGVACDS-GDGRVTRLDLAG-SGLVAGRASLAALS AVDTLQHL  
 ZmBRL3 53 SWAEPNSTSGSASPCEWAGVSCVG---GHVRALDLSGMSLVGRLH--LDALLALPALRSV

AtBRI1 105 FLSNSHIN-----GSV  
 AtBRL1 108 YLOGNYFS-----SGGDS  
 AtBRL2 109 KLSNFFV-----LNS  
 AtBRL3 107 YLOGNFS-----SGDSS  
 OsBRI1 97 SLRGANVS-----GAL  
 OsBRL1 113 NLRGNAFYGNLSHAAPSP---PCALVEVDISSNALNGTLP PPSFLAPCGVLRSVNLSRNL  
 OsBRL2 94 NLSNGE-----LHV  
 OsBRL3 110 DLRGNAFHGDL SRHGS PRAAPCALVEVDISSNTFN GTLPRAFLASC GGLQTLNLSRNL  
 ZmBRI1a 99 SLRGTNVS-----GAL  
 ZmBRI1b 95 SLRGANVS-----GTL  
 ZmBRL1 111 DLRGNAFYGNLSHAAESAS--PCALVEADLSSNAFN GTLPAAFLAPCAALQSLNLSRNL  
 ZmBRL2 101 NLSNGAA-----LRA  
 ZmBRL3 108 LLGNAFHGDLTHRAPP R---CALVDVDLSSNALNGTLPRAFLASCSSLRLLNLSGNTF

AtBRI1 116 SGFK---CSASLTSLDLSRNS-LSGPVTTLTSLG-SCSGLKFLNVSSNTLD FFP--GKVSG  
 AtBRL1 121 SGSD-----CYLQVLDLSSNS--ISDYSMV DYVFSKCSNLVSVNISNN--KLVGKLG FAP  
 AtBRL2 120 TS--LLLLPLTLTHLELSSSG---LIGTLPENFFSKYSNLISITLSYN--NFTGKLPNDL  
 AtBRL3 120 SSSG-----CSLEVL DLSNS--LTDSSIVDYVFSTCLNLVSVNF SHN--KLAGK LKSSP  
 OsBRI1 108 SAAGGARCGSKLQALDLSGNAALRGSVADVAALASACGGLKTLNLSGDAVGA AKVGGGGG  
 OsBRL1 170 AGGG-FPFAPSLRSLDLSRNR--LADAGLLNYSFAGCHGVGYLNLSAN--LFAGRLPE--  
 OsBRL2 104 DAGDLVKLPRALLQLDLS DGG---LAGRLPDGFLACYPNLT DVSLARN--NLTGELPGML  
 OsBRL3 170 TGGG-YFPFSLRRLDMSRNQ--LSDAGLLNYSLTGCHGIQYLNLSAN--QFTGSLPG--  
 ZmBRI1a 110 AAP--RCGAKLQSLDLSGNAGLRGT VADVEALAASCTGLSALNLSGG SVGGPRSAGAVA  
 ZmBRI1b 106 AAVP--RCGAKLQSLDLSANAGLRGSVDVEALVAACAGLSALNLSGGSIGGPRSAGVVA  
 ZmBRL1 169 VGGG-FPFPSLWSLDLSRNH--LADAGLLNYSFAGCHGLRYLNLSAN--QFVGR LPE--  
 ZmBRL2 112 DVTDLLSLPRALQTLDFAYGG---LGGSLPVDLLTLHPNLT TVSLARN--NLTGVLPE SL  
 ZmBRL3 164 TGGGGFPFASLRITL DVS RNE--LSDAGLLNYSLSACHGIRHLNLSAN--QLTGELPPR-

AtBRI1 169 GLKLSNLEVLDSLANSISGANVVGWVLSGCGELKHLAISGNKISGDVDVSRVCVNLEFLD  
 AtBRL1 172 -SSLQSLTTVDLSYNNILSD-KIPESFISDFPASLKYLDLTHNNLSG-----  
 AtBRL2 173 FLSSKKLQTLDSLNNITGPI SGLTIP LSSCVSMTYLD FSGNSISG-----  
 AtBRL3 171 SASNKRIITTVDSLNNRFSDEIPETFADFPNSLKHLDLSGNNVTG-----  
 OsBRI1 168 P-GFAGLDSLDSLNNKITDDSDLRWVVDAGVAVRWLDLALNRIS-----  
 OsBRL1 223 LAACSAVTTLDVSWNHMSG-GLPPGLVATAPANLTYLNIAGNNFTG-----  
 OsBRL2 159 IAS--NIRSFVDSGNNMSGDISGVSIPAT----LAVLDLSGNRFTG-----  
 OsBRL3 223 LAPCTEVSVLDLSWNLMSG-VLPPRFVAMAPANLTYLSIAGNNFSM-----  
 ZmBRI1a 168 SSGFGRLDALDLSNKNISGDGLRWMVVGAGVAVRRLDLSGNKIS-----  
 ZmBRI1b 164 S-GFARLDALDLSGNKNISGDGLRWMVVGAGVAVRQLDLSGNKIS-----  
 ZmBRL1 222 LAPCSVSVLDVSWNHMSG-ALPAGLMSTAPSNLTSLSIAGNNFTG-----  
 ZmBRL2 167 LAEAASTIQWFVDSGNNLSGDISRMSFADT----LTLLDLSENRFGG-----  
 ZmBRL3 219 FAQCSQVSVLDLSGNLMSG-ALPGRLLATAPASLTRLSTIAGNNFSG-----

AtBRI1 229 VSSNNFSTGIPFLGDCSALQHLDISGNKLSG-DFS-RAISTCTELKLLNLISSN-QFVGPI  
 AtBRL1 216 -----DFS DLSFGICGNLTF FLSLQNNLSG-DKFPITLPNCKFLET LNI SRN-NLAGKI  
 AtBRL2 219 -----YISDSLINCTNLKSLNLSYNNFDG--QIPKSFGE LKLLQSLDLSHN-RLTGWI  
 AtBRL3 216 -----DFSRLSFGLCENLTVFSLSONSISG-DRFPVSLSNCKLLET LNL SRN-SLIGKI  
 OsBRI1 212 -----GVPEFTNCSGLQYLDLSGNLIVG-EVPGGALS DCRGLKVLNLSFN-HLAGVF  
 OsBRL1 268 -----DVS GYDFGGCANLTVLDWSYNGLSS-TRLPGLINCR RLETLEM SGNKLLSGAL  
 OsBRL2 199 -----AIPPSLSGCAGLTTLNLSYNGLAG--AIPEGIGAIAGLEVLDVSWN-HLTGAI  
 OsBRL3 268 -----DISDYEFGGCANLTL DWSYNRLRS-TGLPRSLVD CRRLEALDMSGNKLLSGPI  
 ZmBRI1a 213 -----RLPELTNCSGLE YLDLSGNLIAG-EVAGGILADCRGLRTRLNLSGN-HLVGPF  
 ZmBRI1b 208 -----SLPEFTNCSGLE YLDLSGNLIAG-EVAGRTLADCRGLRTRLNLSGN-HLVGPF  
 ZmBRL1 267 -----DVSAYEFGGCANLTVLDWSYNGLSS-SKLP PSLANCRLEVL DMSGNKVLLGGPI  
 ZmBRL2 209 -----AIPPALSRCSGLRTRLNLSYNGLTG--PILESVAGIAGLEVFDVSSN-HLSGPI  
 ZmBRL3 264 -----DISRYQFGGCANLSVLDLSYNRLSATIGLPPSLANCHHLREL DMSGNKILSGRV

AtBRI1 286 PP----LPLKSLQYLSLAENKFTGEIPDFLSGACD TLTGLDLSGNH FYGAVPPFFGSCSL  
 AtBRL1 268 PNGEYWG SFQNLKQLSLAHNRLS GEIPPEL SLLCKTLVILDLSGNTFSGELPSQFTACVW  
 AtBRL2 269 P-----PEIG-DTCRSLQNLRLSYNNFTGVIPESLSSCSW  
 AtBRL3 268 PGDDYWG NFQNLRQLSLAHNLYS GEIPPEL SLLCRTLEVLDLSGNSITGQLPQSFTSCGS  
 OsBRI1 262 P-----PDIAGLTS  
 OsBRL1 321 P--TFLVGFSSLRRLALAGNEFTGAI PVELGQLCGRIVELDLSNRLV GALPASFAKCKS  
 OsBRL2 249 P-----PGLGRNACASLRVLRVSSNNISGSIPELSLSSCHA  
 OsBRL3 321 P--TFLVELQALRRLSLAGNRFTEISDKLSILCKTLVELDLSNQLIGSLPASFGQCRF  
 ZmBRI1a 263 P-----PDVAALTA  
 ZmBRI1b 258 P-----PDVAALTS  
 ZmBRL1 320 P--AFLTGFSSLRRLALAGNEFSGP IPELSQLCGRIVELDLSGNRLV GGLPASFAKCRS  
 ZmBRL2 259 P-----DSIG-NSCASLTILKVSSNNITGPIPASLSACHA  
 ZmBRL3 318 P--EFLGGFRALRRLGLAGNRFTEEIPEL SLLCGTLVQLDLSNQLV GGLPASFSGCRS

AtBRI1 342 LESTALSSNNFSGELPMDTLLKMRGLKVLDLSFNEFSG--ELPESLITNLSASLITLDLSS  
 AtBRL1 328 LQNLNLGNLYLSGDFLNTVVSKITGITYLYVAYNNISG--SVPI SLTNCS-NLRVLDLSS  
 AtBRL2 303 LQSLDSLNNNISGFPNTILRSFGSLQILLNLSNLSG--DFPTSISACK-SLRIADFS  
 AtBRL3 328 LQSLNLGNKLSGDFLSTVVSKLSRITNLYLPFNNSG--SVPI SLTNCS-NLRVLDLSS  
 OsBRI1 271 LNALNLSNNNFSGELPGEAFALQQLTALSLSFNHFNG--SIPDTVASLP-ELQQLDLSS  
 OsBRL1 379 LEVLDLGGNQLAGDFVASVSTIASLRELRLSFNNITGVNPLPVLAAGCP-LLEVIDLGS  
 OsBRL2 284 LRLLDVANNVSGGIPAAVLGNLTAVESLLSNNFISG--SLPDTIAHCK-NLRVADLSS  
 OsBRL3 379 LQVLDLGNQLSGDFVETVITNISSLRVLRLPFNNTIGANPLPALASRCP-LLEVIDLGS  
 ZmBRI1a 272 LTA NLSNNNFSSLPADAYNELRQLKVL SLSFNHFNG--TIPDSLAAALP-ELDVLDLSS  
 ZmBRI1b 267 LAGNLSNNNFSSLPADAFTELQQLKVVALSFNHFNG--SIPDSLAAALP-ELDVLDLSS  
 ZmBRL1 378 LEVLDLGGNQLSGSFVDDVSTISSLRVLRLSFNNTIGQNPALAAAGCP-LLEVVDLGS  
 ZmBRL2 293 LRMFDAA DNKLSGAI PAAVLGNLT SLESLLSNNFISG--SLPSTITSCT-SLRIADLSS  
 ZmBRL3 376 LEVLDLGSNQLSGDFVITVISKISSLRVLRLPFNNTIGTNPLPTLAAGCP-LLEVIDLGS

AtBRI1 400 NNFSGPILPNLCQNPKNL--LQELYLQNNNGFTGKIPPTLSNCSSELVSLHLSFNLYLSGTIPS  
 AtBRL1 385 NGFTGNVPSGFCSLQSSPVLEKILTIANNYLSGTVPMEELGKCKSLKTIIDLSFNELTGPPIPK  
 AtBRL2 360 NFFSGVIPPDLCPGAAS--LEELRLPDNLVTGEIPPAISQCSELRTIDLSLNYLNGTIPP  
 AtBRL3 385 NEFTGEVPSGFCSLQSSSVLEKLLIANNYLSGTVPVELGKCKSLKTIIDLSFNALTGLIPK  
 OsBRI1 328 NTFSGTIPSSLCQDPNSK--LHLLYLQNNYLTGGIPDAVSNCTSLVSLDLSLNYINGSI  
 OsBRL1 438 NELDGEIMPDLCSLPS--LRKLLLPNNYNGTVPVPSLGDANLESIDLSFNLLVKGKIP  
 OsBRL2 341 NKISGALPAELCSPGAA--LEELRLPDNLVAGTIPPGLSNCSRRLRVIDFSINYLGRPIPP  
 OsBRL3 438 NEFDGEIMPDLCSLPS--LRKLLLPNNYINGTVPSSLSNCSNLESIDLSFNLLVKGKIP  
 ZmBRI1a 329 NTFSGTIPSSICQGNSS--LRMLYLQNNYLSGAIPEISNCTKLESIDLSLNNINGTIPA  
 ZmBRI1b 324 NTFSGTIPSSICQGNSS--LRMLYLQNNYLSGAIPEISNCTRLESIDLSLNNINGTIPA  
 ZmBRL1 437 NELVGEIMEDLCSLPS--LRKFLFPNNYNGTVPKSLGNCANLESIDLSFNLLVKGKIP  
 ZmBRL2 350 NKISGVLPAELCSAGAA--LEELRMPDNMVTGIIPPGLSNCSRRLRVIDFSINYLKGPPIPP  
 ZmBRL3 435 NMLEGEIMPELCSLPS--LRKLLLPNNYINGTVPVPSLGNCSNLESIDLSFNLMVGPITP

AtBRI1 459 SLEGSLSKLRDLKLVLMLEGEIQELMY-VKTLETLILDFNDLTGEIPSGLSNCTNINLWI  
 AtBRL1 445 EIWMLPNLSDLVMWANNLTGTIPEGVCVKGGNLETILILNLLTGSIPESISRCTNMIWI  
 AtBRL2 418 ETGNLQKLEQFTAWYNNIAGEIPPEIGK-LQNLKDLILNLLTGEIPPEFFNCSNIEWV  
 AtBRL3 445 EIWTLPKLSDLVMWANNLTGGIPESICVDGGNLETILILNLLTGSIPESISKCTNMLWI  
 OsBRI1 387 SLEGLGNLQDLILWQNELEGEIPASLSR-IQGLEHLILDYNGLTGSIPPELAKCTKLNWI  
 OsBRL1 496 EITIRLPKIVDLVMWANGLSGEIPDVLCSNGTTLETLVISYNNFTGSIPRSITKCVNLIWV  
 OsBRL2 399 ETGRRLALEKLVWVFNGLDGRIPADLQ-CRNLRTLILNLLTGGIPVELFNCTGLEWV  
 OsBRL3 496 EITLFLKLVDLVWANNLSGEIPDKFCFNSTALETLVISYNSFTGNIPESITRCVNLIWL  
 ZmBRI1a 388 SLEKLRDLILWQNLLEGEIPASLEN-LVRLEHLILDYNGLTGGIPRELSKCKELNWI  
 ZmBRI1b 383 SLEKLGELRDLILWQNFLEGEIPASLEN-LDKLEHLILDYNGLTGSIPPELSKCKELNWI  
 ZmBRL1 495 EIMVLPKLVDLVMWANGLSGEIPDMLCSNGTTLETLVISYNNFTGGIPASIFRCVNLIWV  
 ZmBRL2 408 ETGQLRGLKLVWVFNGLGRIPAELGQ-CRGLRTLILNLLTGGIPVELFNCTGLEWV  
 ZmBRL3 493 EIVLLPKLVDLVMWANSLSGEIPDTLCSNSTALKTLVISYNNITGVIPVSI TRCVNLIWL

AtBRI1 518 SLSNRLTGEIPKWIGRLENLAILKLSNNSFSGNIPAEIGDCRSLIWLDLNTNLNFGTIP  
 AtBRL1 505 SLSNRLTGKIPSGIGNLSKLAILQLGNNLSLGNVPRQLGNCKSLIWLDLNSNLTGDLIP  
 AtBRL2 477 SFTSNRLTGEVPKDFGILSRLAVLQLGNNNFTGEIPPELGKCTTLVWLDLNTNLHLTGEIP  
 AtBRL3 505 SLSNRLTGEIPVGIGKLEKLAAILQLGNNSLTGNIPSELGNCKNLIWLDLNSNLTGNLIP  
 OsBRI1 446 SLASNRLSGPIPSWLGKLSYLAAILKLSNNSFSGPIPELGDQCOSLVWLDLNSNQLNGSIP  
 OsBRL1 556 SLSGNRLTGSVPGGFGKLOKLAAILQLKNNLSGHVPAELGSCNLIWLDLNSNSFTGTIP  
 OsBRL2 458 SLTASNRTGTIRPEFGRLSRLAVLQLANNSLAGEIPRELGNCSLWLDLNSNRLTGEIP  
 OsBRL3 556 SLAGNRLTGSIPSGFGNLQNLAILQLKNSLSGKVPALGSCSNLIWLDLNSNELTGTIP  
 ZmBRI1a 447 SLASNQLSGPIPAWLGQLSNLAAILKLSNNSFSGPIPAELGNCOSLVWLDLNSNQLKGSIP  
 ZmBRI1b 442 SLASNQLSGPIPAWLGQLSNLAAILKLSNNSFSGPIPAELGNCOSLVWLDLNSNQLNGSIP  
 ZmBRL1 555 SLSGNRLTGSVPRGFSKLOKLAAILQLKNNLSGVPALGSCNLIWLDLNSNSFTGTIP  
 ZmBRL2 467 SLTASNRTGTIRPEFGRLSRLAVLQLANNSLGGVIPKELGKCSLWLDLNSNRLTGEIP  
 ZmBRL3 553 SLAGNSMTGSVPAGFGNLQKLAAILQLHRNSLSGVPALGRCNLIWLDLNSNNSFSGAI

AtBRI1 578 AAMFKQSG-KTAAANFTAGKRYVYIKNDGMKKECHGAGNLLFEQGRSEQLNRLSTRNPCN  
 AtBRL1 565 GELASQAG-LVMPGSVSGKQFAFVRNE--GGTDCRGAGGLVEFEGIRAERLERLPMVHSCP  
 AtBRL2 537 PRLGRQPGSKALSGLLSGNTMAFVRNV--GNSCKGVGGLVEFEGIRPERLLQIPSLKSCD  
 AtBRL3 565 GELASQAG-LVMPGSVSGKQFAFVRNE--GGTDCRGAGGLVEFEGIRAERLEHFPMVHSCP  
 OsBRI1 506 KELAKQSG-KMNVGLIVGRPYVYLRNDELSSECRGKGSLEFTSIRPDDL SRMPSKKL CN  
 OsBRL1 616 PQLAQAG-LVPGGIVSGKQFAFLRNE--AGNICPGAGVLEFFFGIRPERLAEFPAVHLCP  
 OsBRL2 518 RRLGRQLGSTPLSGILSGNTLAFVRNV--GNSCKGVGGLLEFAGIRPERLLQVPTLKSCD  
 OsBRL3 616 PQLAAQAG-LITGAVVSGKQFAFLRNE--AGNICPGAGVLEFFLDIRPDRLANFPAVHLCS  
 ZmBRI1a 507 AELAKQSG-KMNVGLVLRPYVYLRNDELSSECHGKGSLEFTSIRPEELSRMPSKKL CN  
 ZmBRI1b 502 AELAKQSG-KMNVGLVLRPYVYLRNDELSSECHGKGSLEFTSIRPEELSRMPSKELCN  
 ZmBRL1 615 PELASQAG-LVPGGIVSGKQFAFLRNE--AGNICPGAGVLEFFFGIRPERLAAFPVHLCP  
 ZmBRL2 527 RRLGRQLGSTPLSGILSGNTLAFVRNV--GNSCKSVGGLLEFAGIRPERLLQVPTLKSCD  
 ZmBRL3 613 PQLAAQAG-LITGMVSGKQFAFLRNE--AGNICPGAGVLEFFDIRPERLAQFPVHSCA

AtBRI1 637 ITSRVYGGHTSPTFDNNGSMFLDMSYNMLSGYIPKEIGSMPYLFILNLGHNDISGSIPTD  
AtBRL1 623 AT-RIYSGMTMYTFSANGSMIYFDISYNAVSGFIPPGYGNMGYLQVLNLGHNRITGTIPD  
AtBRL2 595 FT-RMYSGPILSLFTRYQTIEYLDLSYNQLRGKIPDEIGEMIALQVLELSHNQLSGEIPF  
AtBRL3 623 KT-RIYSGMTMYMFSSNGSMIYLDLSYNVSGSIPPLGYGAMGYLQVLNLGHNLLTGTIPD  
OsBRI1 565 FT-RMYVGSSTEYTFNKNGSMIFLDLSYNQLDSAIPGELGDMFYLMIMNLGHNLLSGTIPS  
OsBRL1 674 ST-RIYTGTVYTFNNGSMIFLDLSYNGLTGTIPGSLGNMMLYQVLNLGHNELNGTIPD  
OsBRL2 576 FT-RLYGAAVSGWTRYQTLEYLDLSYNLDGEIPEELGDMVVLQVLDLARNNLTGEIPA  
OsBRL3 674 ST-RIYTGTVYTFNNGSMIFLDLSYNGLTGTIPASFGNMTYLEVLNLGHNELTGAIPD  
ZmBRI1a 566 FT-RVYMGSTEYTFNKNGSMIFLDLSFNQLDSEIPKELGNMYYLMIMNLGHNLLSGVIPP  
ZmBRI1b 561 FT-RVYMGSTEYTFNKNGSMIFLDLSFNQLDSXIPKELGNMYYLMILNLGHNLLSGVIPP  
ZmBRL1 673 ST-RIYTGTVYTFDKNGSMIFLDISYNRLTGAIPAGLGNMMLYEVNLGHNDLNGTIPY  
ZmBRL2 585 FT-RLYGAAVSGWTRYQTLEYLDLSYNALSGGIPEEFGDMVVLQVLDLARNNLTGEIPA  
ZmBRL3 671 ST-RIYTGTVYTFNQSGSMIFLDLSYNGLTGTIPASLGNMTYLDVNLGHNDLTGAIPD

AtBRI1 697 EVGDLRGLNILDLSNNKLDGRIPQAMSAITMLTEIDLNNNLSGPIPEMGQFETFPFAKF  
AtBRL1 682 SFGGLKATGVLDLSHNQLQGYIPGSLGSLFSLSDLDVSNNNLTGPIPFGGQLTTFPVSRY  
AtBRL2 654 TIGQLKNLGVFDASDNRLQGOIPESFSNLSFLVQIDLSNNELTGPQPORGQLSTLPATQY  
AtBRL3 682 SFGGLKATGVLDLSHNDLQGFIPGSLGGLSFLSDLDVSNNNLTGPIPFGGQLTTFPLTRY  
OsBRI1 624 RLAEAKKLAVLDLSYNQLEGPIPNFSFALS-LSEINLSNNQLNGTIPELGSLATFPKSOY  
OsBRL1 733 AFQNLKSTGALDLSNNQLSGGIPPGGLGGLNFLADFDVSNNNLTGPIPSSGQLTTFPPSRY  
OsBRL2 635 SLGRLHNLGVFDVSRNRLQGGIPDSFSNLSFLVQIDISDNNLSGEIPORGQLSTLPASOY  
OsBRL3 733 AFTGLKATGALDLSHNHLTGVIIPGFCGLHFLADFDVSNNNLTGEIPTSGQLITFPASRY  
ZmBRI1a 625 ELGAKKLAVLDLSHNQLQGPINFSFSTLS-LSEINLSNNQLNGSIPELGSLTFPFRISY  
ZmBRI1b 620 ELGAKKLAVLDLSHNQLQGPINFSFSTLS-LSEINLSNNQLNGSIPELGSLTFPFRISY  
ZmBRL1 732 EFSGLKLVGALDLSNNHLTGVIIPGGLGGLTFLADLDVSNNNLSGPIPSTGQLTTFPOSRY  
ZmBRL2 644 SLGRLHNLGVFDVSHNALSGGIPDSFSNLSFLVQIDVSDNNLSGEIPORGQLSTLPASOY  
ZmBRL3 730 AFTGLKATGVLDLSHNHLTGVIIPAGLGLNFLADFDVSNNNLTGEIPTSGQLSTFPASRF

AtBRI1 757 LNNPGLCGYPLPRCDPSNADGYAHQRSHGRRPASLAGSVAMGLLFSFVCFIFGLILVGRE  
AtBRL1 742 ANNSGLCGYPLRPGCSAPRR--PITSRIHAKKQT-VATAVIAGIAFSFMCVVMLVMA---  
AtBRL2 714 ANNPGLCGYPLPECKNGNQLPAG---TEEGKRAKHGTRAASWANSIVLGVLSAASVC-  
AtBRL3 742 ANNSGLCGYPLPPCSSGSR---PTRSHAHPKKQS-IATGMSAGIVFSFMCIVMLIMA---  
OsBRI1 683 ENNTGLCGYPLPPCDHSS-PRSSNDHQSH-RRQASMASSIAMGLLFSLFCII-VIIIAIG  
OsBRL1 793 DNNPGLCGYPLPPCGHNPPWGGRRPRGSPDGKRKV-IGASILVGVALSVLILLILLVVT---  
OsBRL2 695 AGNPGLCGMPLPCCGDRLPATMSGLAAAASDPPPRRAVATWANGVILAVLVSAGLAC-  
OsBRL3 793 ENNSGLCGYPLNPCVHNSGAGGLPQT-SYGHNF-ARQSVFLAVTSLVILIFSLLIITHYK  
ZmBRI1a 684 ENNSGLCGYPLPPCGHNAGSSSSGDHRSH-RTQASLAGSVAMGLLFSLFCIVGIVIIAIE  
ZmBRI1b 679 ENNSGLCGYPLPPCGHNAGSSSSGDHRSH-RNQASLAGSVAMGLLFSLFCIVGIVIIIVVE  
ZmBRL1 792 ANNSGLCGYPLPPCGHDPGQGSVPSASSDGRRKV-VGGSSILVGVIVLSMLTLLILLVTT--  
ZmBRL2 704 TGNPGLCGMPLPCCG-TPRATASVLAPPDGSFRDR---SLWV--VILAVLVTGVVACG  
ZmBRL3 790 ENNSGLCGYPLDPCTHNASTGGVQPONS NVRRKF-LEEFVLLAVSLTVLMVATLVVVTAYK

AtBRI1 817 MRKRKRKKE---AELEMYAEGHNSGDRTANNINWK-LTGVKEALSINLAAFEKPLRKLK  
AtBRL1 796 -LYRVRKVQKKEQKREKYIESLPTSG-----SCSWK-LSSVPEPLSINVATFEKPLRKLK  
AtBRL2 770 ILTVWAIAVRARRRDADAKMLHSLQAVN-SATTWKIEK-EKEPLSINVATFQRQLRKLK  
AtBRL3 795 -LYRARKVQKKEQKREKYIESLPTSG-----SSSWK-LSSVHEPLSINVATFEKPLRKLK  
OsBRI1 740 SKRRRLKNEEASTSRDIYIDSRSHSA---TMNSDWRQNLSGTNLLSINLAAFEKPLQNLK  
OsBRL1 849 -LCKLRMNRKTEEVRTGYVESLPTSG-----TSSWK-LSGVREPLSINVATFEKPLRKLK  
OsBRL2 754 AAIIWAVAAARRREVRSAMMLSSLDGTRTATTWKLKGAKEALSINVATFQRQLRKLK  
OsBRL3 851 -LWKFHKNKTKEIQ-AGCSESLPGSS-----KSSWK-LSGIGEPLSINMAIFENPLRKLK  
ZmBRI1a 743 CKRKRQINEEASTSRDIYIDSRSHSG---TMNSNWR--LSGTNALSINLAAFEKRLQKLT  
ZmBRI1b 738 CKRKRQINEEASTSRDIYIDSRSHSG---TMNSNWR--LSGTNALSINLAAFEKRLQKLT  
ZmBRL1 849 -LCKLRMNRKTEEMRTGYIQSLPTSG-----TTSWK-LSGVHEPLSINVATFEKPLKLT  
ZmBRL2 758 MAVACFVVARARRKEAREARMLSSLDGTRTATTWKLKGAKEALSINVATFQRQLRRLK  
ZmBRL3 849 -LRRPRGSKTEEIQTAGYSDSPASST-----STSWK-LSGSKEPLSINLAIIFENPLRKLK

AtBRI1 873 FADLLQATNGFHNDSLIGSGGFGDVYKAILKDGSAVAIKKLIHVSGQGDREFMAEMETIG  
 AtBRL1 849 FAHLLEATNGFSAETMVGSGGFGGEVYKAQLRDGSSVVAIKKLIRITGQGDREFMAEMETIG  
 AtBRL2 828 FSOLLEATNGFSAASMIGHGGFGEVFKATLTKDGSSVAIKKLIRLSCQGDREFMAEMETLIG  
 AtBRL3 848 FAHLLEATNGFSAASMIGSGGFGDVYKAKLADGSSVVAIKKLIQVTVGQGDREFMAEMETIG  
 OsBRI1 797 IADLVEATNGFHIACQIGSGGFGDVYKAQLKDGKVVVAIKKLIHVSGQGDREFTAEMETIG  
 OsBRL1 902 FAHLLEATNGFSAETLIGSGGFGGEVYKAKLTKDGSSVVAIKKLIHFTGQGDREFTAEMETIG  
 OsBRL2 814 FTOLLEATNGFSTASLIGSGGFGGEVFKATLTKDGSCVAIKKLIHLSYQGDREFMAEMETLIG  
 OsBRL3 903 FSDLHQATNGFCAETLIGSGGFGGEVYKAKLTKDGNIVAVKLLMHFTGQGDREFTAEMETIG  
 ZmBRI1a 798 FNDLIVATNGFHNDSLQIGSGGFGDVYKAQLKDGKVVVAIKKLIHVSGQGDREFTAEMETIG  
 ZmBRI1b 793 FNDLIVATNGFHNDSLIGSGGFGDVYKAKLTKDGKVVVAIKKLIHVSGQGDREFTAEMETIG  
 ZmBRL1 902 FAHLLEATNGFSAETLIGSGGFGGEVYKAKLTKDGTVVAIKKLIHFTGQGDREFTAEMETIG  
 ZmBRL2 818 FTOLLEATNGFSAAGSLVSGGFGGEVFKATLTKDGSCVAIKKLIHLSYQGDREFTAEMETLIG  
 ZmBRL3 902 YAHLLEATNGFSSALVGTGGFGEVYKARLMDGSSVVAIKKLMHFTGQGDREFTAEMETIG

AtBRI1 933 KIKHRNLVPLLGYCKVGERLLVYEFMKYGSLEDVLHDPK--KAGVKLNWSTRRKIAIGS  
 AtBRL1 909 KIKHRNLVPLLGYCKVGEERLLVYEMKWSLETVLHEKSSKGGIYLNWAARKKIAIGA  
 AtBRL2 888 KIKHRNLVPLLGYCKIGEERLLVYEFMQYGSLEEVLHGPRTEKRRILGWEEARKKIAKGA  
 AtBRL3 908 KIKHRNLVPLLGYCKIGEERLLVYEMKYSLETVLHEKT-KKGGIFLDWSARKKIAIGA  
 OsBRI1 857 KIKHRNLVPLLGYCKAGEERLLVYDYMFKGSLEDVLHDKR--KIGKLNWEARKKIAVGA  
 OsBRL1 962 KIKHRNLVPLLGYCKIGDERLLVYEMKHGSLDVLHDKA-KAS-VKLDWSARKKIAIGS  
 OsBRL2 874 KIKHRNLVPLLGYCKIGEERLLVYEFMHSLSLEDTLHGDDGRSASPAMSWEQRKKVARGA  
 OsBRL3 963 KIKHRNLVPLLGYCKIGDERLLVYEMKNGSLDFVLHDKG-EAN-MDLNWAARKKIAIGS  
 ZmBRI1a 858 RIKHRNLVPLLGYCKCGERLLVYDYMRFSGLEDVLHDKR--KIGIKLNWAARKKIAIGA  
 ZmBRI1b 853 RIKHRNLVPLLGYCKCGERLLVYDYMRFSGLEDVLHDKR--KTGIKLNWAARKKIAIGA  
 ZmBRL1 962 KIKHRNLVPLLGYCKIGDERLLVYEMKHGSLDVLHDKA-KTAGVKLDWAARKKIAIGA  
 ZmBRL2 878 KIKHRNLVPLLGYCKIGEERLLVYEMSNGLDGLHGRALR-----LPWEERKRVARGA  
 ZmBRL3 962 KIKHRNLVPLLGYCKVGERLLVYEMNNGSLDVLHDKA-KTD-VGLDWAARKKIAVGS

AtBRI1 991 ARGLAFLHHCSPHIIHRDMKSSNVLLDENLEARVSDFGMARLMSAMDTHLSVSTLAGTP  
 AtBRL1 969 ARGLAFLHHCSPHIIHRDMKSSNVLLDEDFEARVSDFGMARLVSALDTHLSVSTLAGTP  
 AtBRL2 948 ARGLAFLHHCSPHIIHRDMKSSNVLLDQDMEARVSDFGMARLISALDTHLSVSTLAGTP  
 AtBRL3 967 ARGLAFLHHCSPHIIHRDMKSSNVLLDQDFVARVSDFGMARLVSALDTHLSVSTLAGTP  
 OsBRI1 915 ARGLAFLHHCSPHIIHRDMKSSNVLIDQLEARVSDFGMARLMSVVDTHLSVSTLAGTP  
 OsBRL1 1020 ARGLAFLHHCSPHIIHRDMKSSNVLLDNNLDARVSDFGMARLMNALDTHLSVSTLAGTP  
 OsBRL2 934 ARGLCFLHYNCIPHIIHRDMKSSNVLLDGDMEARVADFGMARLISALDTHLSVSTLAGTP  
 OsBRL3 1021 ARGLAFLHHCSPHIIHRDMKSSNVLLDGNFDAYVSDFGMARLMNALSHTLTVSMLSGTP  
 ZmBRI1a 916 ARGLAFLHHCSPHIIHRDMKSSNVLIDQLEARVSDFGMARMSVVDTHLSVSTLAGTP  
 ZmBRI1b 911 ARGLAFLHHCSPHIIHRDMKSSNVLIDQLEARVSDFGMARMSVVDTHLSVSTLAGTP  
 ZmBRL1 1021 ARGLAFLHHCSPHIIHRDMKSSNVLLDNNLEARVSDFGMARLMNALDTHLSVSTLAGTP  
 ZmBRL2 933 ARGLCFLHHCSPHIIHRDMKSSNVLLDGDMEARVADFGMARLISALDTHLSVSTLAGTP  
 ZmBRL3 1020 ARGLAFLHHCSPHIIHRDMKSSNVLLDNNLDAYVSDFGMARLVNAVDSHTLTVSKLLGTP

AtBRI1 1051 GYVPPEYYQSFRCSTTKGDVYSYGVVLELLLTGKRPTDSPDFG-DNNLVGWVKQHA-KLRI  
 AtBRL1 1029 GYVPPEYYQSFRCCTAKGDVYSYGVVLELLLTGKRPIDPGEFGE-DNNLVGWAKQLYREKRG  
 AtBRL2 1008 GYVPPEYYQSFRCCTAKGDVYSYGVVLELLLTGKRPIDKEEFG-DTNLVGWSKMKAREGKH  
 AtBRL3 1027 GYVPPEYYQSFRCCTAKGDVYSYGVVLELLLTGKRPIDPEEFG-DNNLVGWAKQLYREKRG  
 OsBRI1 975 GYVPPEYYQSFRCCTTKGDVYSYGVVLELLLTGKPPTDSADFGEDNNLVGWVKQHT-KLKI  
 OsBRL1 1080 GYVPPEYYQSFRCCTTKGDVYSYGVVLELLLTGKRPIDPTEFG-DNNLVGWVKQMVKENRS  
 OsBRL2 994 GYVPPEYYQSFRCCTVTKGDVYSYGVVLELLLTGRRPTDKDDFG-DTNLVGWVKMKVGDGAG  
 OsBRL3 1081 GYVPPEYQSFRCCTTKGDVYSYGVVLELLLTGKRPIDPTEFG-DSNLVGVVKQMV-EDRC  
 ZmBRI1a 976 GYVPPEYYQSFRCCTTKGDVYSYGVVLELLLTGKPPTDSTDFGEDNNLVGWVKQHS-KSKL  
 ZmBRI1b 971 GYVPPEYYQSFRCCTTKGDVYSYGVVLELLLTGKPPTDSTDFGEDNNLVGWVKQHS-KSRL  
 ZmBRL1 1081 GYVPPEYYQSFRCCTTKGDVYSYGVVLELLLTGKRPIDPTEFG-DNNLVGWAKQMVKENRS  
 ZmBRL2 993 GYVPPEYYQSFRCCTAKGDVYSYGVVLELLLTGRRPTDKEDFG-DTNLVGWVKMKVREGTG  
 ZmBRL3 1080 GYVAPEYQSFVICTTKGDVYSYGVVLELLLTGKRPINPTEFG-DNNLIDWAKQMKEDRC

```

AtBRI1 1109 SDVFDPELMKEDPALEI-----ELLQHLKVAVACLDDRAWRRPTMVQVMAMF
AtBRL1 1089 AEILDPELVT-DKSGDV-----ELFHYLKIASQCLDDRPFKRPTMIQLMAMF
AtBRL2 1067 MEVIDEDLLKEGSSSESLNEKEGFEGGVIVKEMLRYLEIALRCVDDFPSKRPNMLQVVASL
AtBRL3 1087 AEILDPELVT-DKSGDV-----ELLHYLKIASQCLDDRPFKRPTMIQVMTMF
OsBRI1 1034 TDVFDPELLKEDPSVEL-----ELLEHLKIACACLDDRPSRRPTMLKVMAMF
OsBRL1 1139 SEIFDPTLTD-RKSGEA-----ELYQYLKIACECLDDRPNRRPTMIQVMAMF
OsBRL2 1053 KEILDPELVVEGADAD-----EMARFMDMALQCVDDFPSKRPNMLQVVAML
OsBRL3 1139 SEIYDPTLMA-TTSSEL-----ELYQYLKIACRCLDDQPNRRPTMIQVMTMF
ZmBRI1a 1035 ADIFDPELVLLVEDPALEI-----ELLEHLKIACACLDDRPSKRPTMLKVMAMF
ZmBRI1b 1030 TDFDPELVKEDPALEI-----ELLEHLKVACACLDDRPSKRPTMLKVMAMF
ZmBRL1 1140 GDFDPTLTN-TKSGEA-----ELYQYLKIARDCLDDRPNQRPTMIQVMAMF
ZmBRL2 1052 KEVFDPELVIAAVDGE-----KEMARFLELSLQCVDDFPSKRPNMLQVVATL
ZmBRL3 1139 SEIFDPTLTD-TKSCSE-----ELYQYLAIAACCLDDQPSRRPTMIQVMAMF

```

```

AtBRI1 1156 KEIQAGSGIDSQSTIRS----IEDGGFSTIEMVDMSIKEVPEGKL
AtBRL1 1135 KEMKADTEEDES-----LDEFSLKETPLVEESRDKEP----
AtBRL2 1127 RELRGSENNNSHSH-----SNSI-----
AtBRL3 1133 KELVQVDTENDS-----LDEFLLKETPLVEESRDKEP----
OsBRI1 1081 KEIQAGSTVDSKTSSAAAGSIDEGGYGLDMP-LREAKEEKD--
OsBRL1 1185 KEIQLDS-DSDI-----LDGFSINSSTIDESGEKSM----
OsBRL2 1099 RELDAPPATAI-----
OsBRL3 1185 KEFQVDS-GSNF-----LDDFSLNSTNMEESSEKSV-----
ZmBRI1a 1082 KEMQASSAVDSKTSACTV-AVDDACFGDVEMTTLKEDKEEKD--
ZmBRI1b 1077 KEMQASSTVDSKTSACT----DDACFADVEMTTLKEDKEEKD--
ZmBRL1 1186 KDIHLDP-DSDF-----LDGFSINSSTIDESAEKPT----
ZmBRL2 1100 RELDDAPPSHQQA-----PASACD-----
ZmBRL3 1185 SEFQIDS-GSFF-----LDGFSLD-----SDRGII-----

```

**Supplemental Figure S1.** Amino acid sequence alignment of BRI1 homologs from Arabidopsis (At), rice (Os) and maize (Zm).

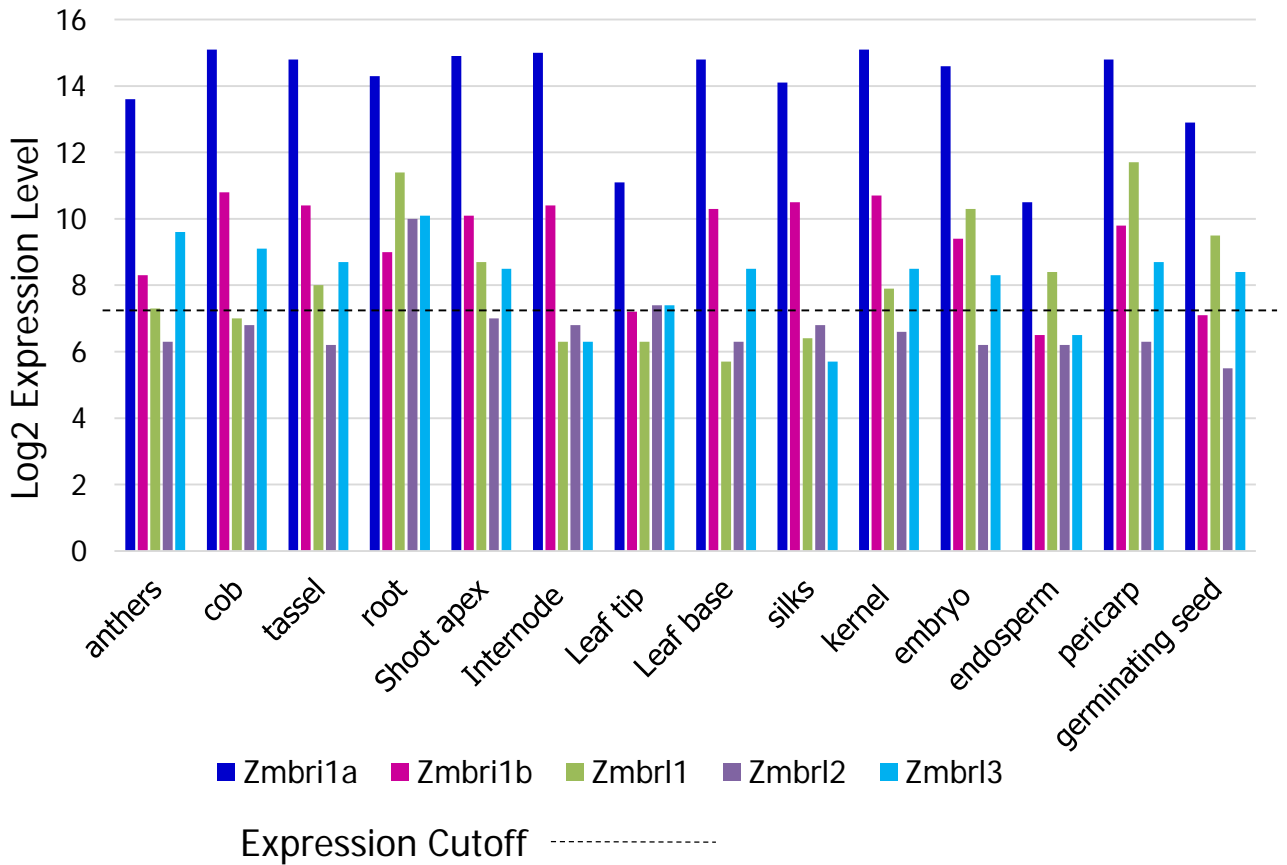

**Supplemental Figure S2.** Transcript levels of maize *bri1* homologs in B73 maize tissues. Data were retrieved from the Maize Gene Expression Atlas (Sekhon et al., 2011) using the eFP tool (Winter et al., 2007) available through MaizeGDB (Monaco et al., 2013). The histogram contains data from the following subset of available samples that were chosen to survey expression patterns: (anthers, immature cob, immature tassel stage v13, primary root stage v1, shoot apex stage v4, internode 4 stage v9, tip expanding leaf stage v7, base expanding leaf v7, silks stage r1, whole kernel 2 DAP, embryo 16 DAP, endosperm 16 DAP, pericarp 16 DAP, and germinating seed 24 hr after radicle emergence). The dotted line represents the gene expression cutoff value below which the authors consider a gene as not expressed.

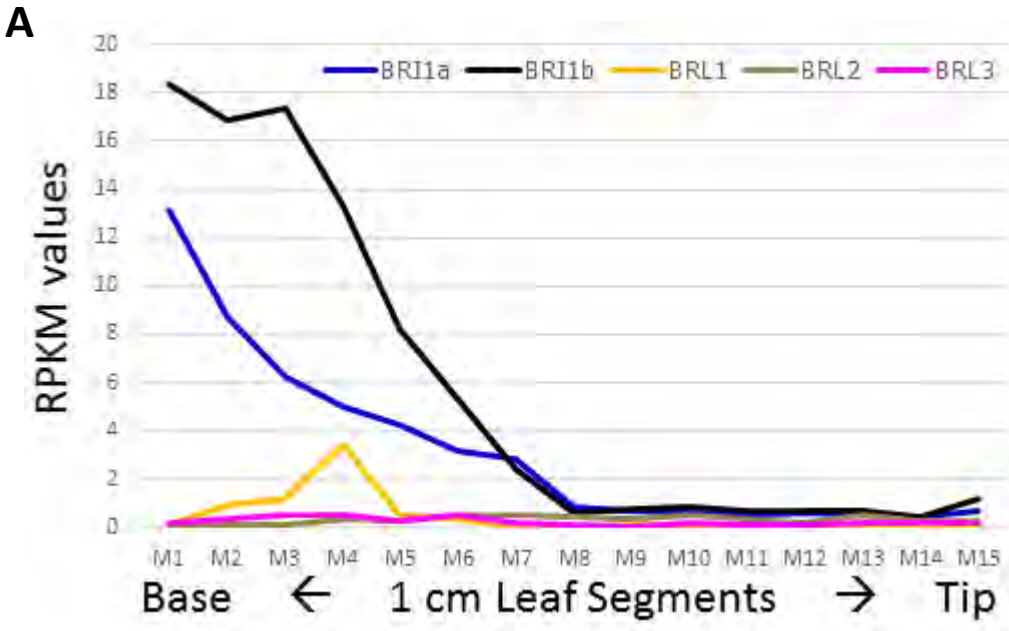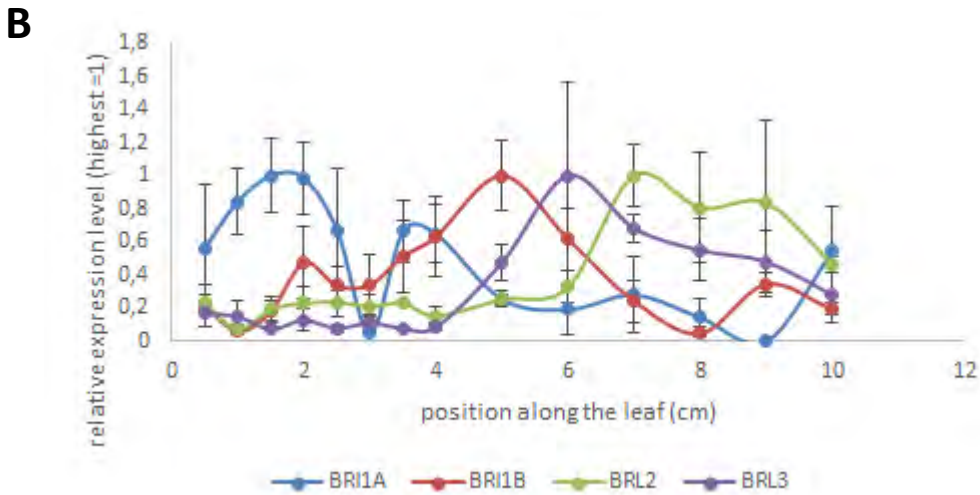

**Supplemental Figure S3.** A, Transcript levels of maize BRI1 homologs in developing B73 maize seedling leaf 3. Data were retrieved from publically accessible RNAseq transcriptomic analysis along the maturation gradient of a growing leaf (Wang et al., 2014). RNA was extracted from 1cm segments beginning at the base of the leaf (M1) and going to the tip (M15). The base is the meristematic zone of active cell division whereas tissues at the tip are fully differentiated and mature. B, Relative transcript levels in 1 cm increments along maize seedling leaf 4 as determined by quantitative reverse transcriptase polymerase chain reaction.



RNAi 1 TGGACCTCTCCGGAACAAGAT---CTCTCGG-----CTCCCAGAGCTCACCAACT  
ZmBRI1a 1 TGGACCTCTCCGGAACAAGAT---CTCTCGG-----CTCCCAGAGCTCACCAACT  
ZmBRI1b 1 TGGACCTCTCCGGAACAAGAT---CTCTAGC-----CTGCCGGAGTTTACCAACT  
ZmBRL1 1 TGGACTGGTCCCTTCAACGGCCTGAGCAGCAGCAAG---CTGCCGCCGAGCTCTGCCAACT  
ZmBRL2 1 TCGACCTGTCCGAGAACCCTT---CGGTGGCGCG---ATCCCGCCGGCCTGTCTACGCT  
ZmBRL3 1 TTGATCTTTCGTACAACAGACTGAGCGCCACCATAGGGTTGCCACCGAGTCTTGCCAATT

RNAi 49 GCTCTGGGCTTGAGTACCTCGACCTCTCCGG---CAACCTCATCGCGGG---CGAGGTAGC  
ZmBRI1a 49 GCTCTGGGCTTGAGTACCTCGACCTCTCCGG---CAACCTCATCGCGGG---CGAGGTAGC  
ZmBRI1b 49 GCTCTGGGCTGGAGTACCTCGACCTCTCCGG---CAACCTCATCGCGGG---CGAGGTAGC  
ZmBRL1 58 GCGGCCGCTTGAGGTGCTGGACATGTCCGGGAAACAAGGCTCTCGCGGCCCGCATCCCGG  
ZmBRL2 55 GCTCGGGGCTCAGGACGCTCAACTTGTCTGTA---CAACGGCTCACCGGGCCGATACTGG  
ZmBRL3 61 GCCACCACCTCAGGGAAGTAGACATGTCTGGGAAACAAGATTCTGTCTGGGCCGAGTACCGG

RNAi 104 CCGCGGGATTCTCGCTGACTGCCGTGGCCTGAGAACGCTCAACCTCTCAGGCAACCACCT  
ZmBRI1a 104 CCGCGGGATTCTCGCTGACTGCCGTGGCCTGAGAACGCTCAACCTCTCAGGCAACCACCT  
ZmBRI1b 104 CCGCAGGACTCTCGCTGACTGCCGTGGTCTGAGAACGCTCAACCTCTCAGGCAACCACCT  
ZmBRL1 118 CGTTCC-----TGACTGGCTTCTCCTCGCTGAAGCGGCTGGCATTGGCCGGCAACGAGTT  
ZmBRL2 112 AGTCCG-----TGGCTGGAATCGCCGGCCTTGAGGTGTTCCGACGTCTCGTCAACCACCT  
ZmBRL3 121 AGTTCC-----TGGGGGCTTCCGAGCATTCCGGCGACTCGGACTTGCCGGGAACAACCTT

RNAi 164 GGTCCGCCCG---TTCCCGCCGGACGTCGCCGCCCTC---ACCGCTCTCACCGCGCTAAACCT  
ZmBRI1a 164 GGTCCGCCCG---TTCCCGCCGGACGTCGCCGCCCTC---ACCGCTCTCACCGCGCTAAACCT  
ZmBRI1b 164 GGTCCGCCCG---TTCCCGCCGGACGTCGCCGCCCTC---ACCTCGCTCGCCGGACTCAACCT  
ZmBRL1 173 CTCGGGCCCATACCGGATGAGCTCAGCCAGCTCTCGGGCAGAATCGTTGAGCTGGACCT  
ZmBRL2 167 CAGCGGCCCGATCCCCGACAGTATAGCAACTCATGTGCTTTCGCTGACAATTCTGAAGGT  
ZmBRL3 176 CACCGAGGAATCCCGGATGAGCTGAGCCTCCTGTGCGGAACGCTGGTTCAGCTAGACTT

RNAi 221 GTCAAACAACAACCTTCTCCAGCGAGCTCCCCGCCGACGCTTACAACGAACCTACGGCAGCT  
ZmBRI1a 221 GTCAAACAACAACCTTCTCCAGCGAGCTCCCCGCCGACGCTTACAACGAACCTACGGCAGCT  
ZmBRI1b 221 CTCAAACAACAACCTTCTCCAGCGACTCCCCGCCGACGCTTTCACCGAGCTACAGCAGCT  
ZmBRL1 233 GTCAGGCAACC---GGCTGGTTGGT---GGCTTGGCCGCAAGCTTTGCCAAGTGCAGGT---CACT  
ZmBRL2 227 GTCAGCAACAACATCACGGGA---CCCATCCCCGGCGTCTCTGTCCGGCGTCCATG---CGCT  
ZmBRL3 236 GTCAGCAACAACATTTGGTTGGC---GGTTTGCAGCGAGCTTCTCAGGATGCAGAT---CGCT

RNAi 281 CAAGGTGCTGTCCTCTCCTTCAACCACTTCAACGGCACCATTCCGGACTCCTT---GG  
ZmBRI1a 281 CAAGGTGCTGTCCTCTCCTTCAACCACTTCAACGGCACCATTCCGGACTCCTT---GG  
ZmBRI1b 281 CAAGGTGCTCGCCTCTCCTTCAACCACTTCAACGGCAGTATTCCGGACTCCTT---GG  
ZmBRL1 290 CGAGGTGCTTGACCTCGGTGGCAACCAGCTCTCTGGGAGCTTTGTGGACGATGTCGTCAG  
ZmBRL2 284 GCGGATGTTCCGACGCTGGGACAACAAGCTGTCCGGTGCCATACCGGCCGCGGTGCTCGG  
ZmBRL3 293 TAGGTGCTCGATCTGGGTAGCAACCAGCTGTCAAGTACTTTGTGATCACTGTGATCAG

RNAi 337 CAGCGCTGCCGGAGCTCGACGTGCTGGACCTCAGCTCCAACACCTTCTCCGGCACCATCC  
ZmBRI1a 337 CAGCGCTGCCGGAGCTCGACGTGCTGGACCTCAGCTCCAACACCTTCTCCGGCACCATCC  
ZmBRI1b 337 CAGCGCTGCCGGAGCTCGACGTGCTGGACCTCAGCTCCAACACCTTCTCCGGCACCATCC  
ZmBRL1 350 CACC-ATCTCTCGCTCCCGGTGCTGCGGCTGTGCTTCAACAACATCACCGGGCAGAAACC  
ZmBRL2 344 CAAC-CTGACATCGCTGGAGAGCCTGCTGTAAGCAACAACCTTTCATCTCGGGCTCCCTCC  
ZmBRL3 353 CAAG-ATCTCTCTGCTGTGCTGAGGCTGCCGTTCAACAATATCACAGGCACAAATC

RNAi 397 C-----TTCGTCCATCTGCCAAGG---CCCCAACTCCAGC-----CT  
ZmBRI1a 397 C-----TTCGTCCATCTGCCAAGG---CCCCAACTCCAGC-----CT  
ZmBRI1b 397 C-----TTCGTCCATCTGCCAAGG---CCCCAACTCCAGC-----CT  
ZmBRL1 409 CG-----CTGCCGGCGCTGGCGGCGGGTTGCCATTGCTCGAGG---TGGTCTGACCT  
ZmBRL2 403 CGAGCACGATCACCTCCTGACCCAGCCTCAGGATCGCCGACCTCAGCAGCAACAAGATCT  
ZmBRL3 412 CT-----CTGCCACGCTAGCAGCTGGCTGCCCTTTGCTTGAAG---TCATTGATCT

|         |     |                                                               |
|---------|-----|---------------------------------------------------------------|
| RNAi    | 431 | CCG-----CATGCT-----GTACCTC-----                               |
| ZmBRI1a | 431 | CCG-----CATGCT-----GTACCTC-----                               |
| ZmBRI1b | 431 | CCG-----CATGCT-----GTACCTC-----                               |
| ZmBRL1  | 458 | CGGGTCCAAAGCTTGTCGGTGAGATCATGGAAGATCTCTGCTCATCACTGCCGTTCGCT   |
| ZmBRL2  | 463 | CCGG-----CGTGCTG-----CCGGCGACCTCTGCTCGGCTGGCGCCGCGCT          |
| ZmBRL3  | 461 | CGGGTCTAAACATGCTGGAAGGAGAGATCATGCCGAGCTGTGTTTCATCTTTGCCATCACT |
|         |     |                                                               |
| RNAi    | 447 | -----CAGAACAACCTACCTCTCCGGCGCCATCCCGGAGTCAAATCTCCAA           |
| ZmBRI1a | 447 | -----CAGAACAACCTACCTCTCCGGCGCCATCCCGGAGTCAAATCTCCAA           |
| ZmBRI1b | 447 | -----CAGAACAACCTACCTCTCCGGCGCCATCCCTTGAAGTCAAATCTCCAA         |
| ZmBRL1  | 518 | GCGGAAGCTGTTCCCTCCCAACAATACCTCAATGGCACAGTGCCGAAGTCCGTGGGTAA   |
| ZmBRL2  | 506 | TGAGGAGCTCCGGATGCCGGACAACATGGTCAACCGGCATCATCCCACCGGGTCTTTCCAA |
| ZmBRL3  | 521 | CAGAAAGCTGCTCCTACCCAACAACCTACATCAATGGAACCGTGCCGCCCTCACCTGGCAA |
|         |     |                                                               |
| RNAi    | 491 | CTGCACCA                                                      |
| ZmBRI1a | 491 | CTGCACCA                                                      |
| ZmBRI1b | 491 | CTGCACCA                                                      |
| ZmBRL1  | 578 | CTGCACCA                                                      |
| ZmBRL2  | 566 | CTGCTCGC                                                      |
| ZmBRL3  | 581 | CT-----                                                       |

**Supplemental Figure S4.** Nucleotide sequence of the *zmbri1a* cDNA used for RNAi construct aligned with BRI1 homologs. Nucleotide base 1 of the RNAi fragment corresponds to base 721 of *Zmbri1a*, 745 of *Zmbri1b*, 1180 of *zmbri1*, 751 of *zmbri2*, and 919 of *zmbri3*.

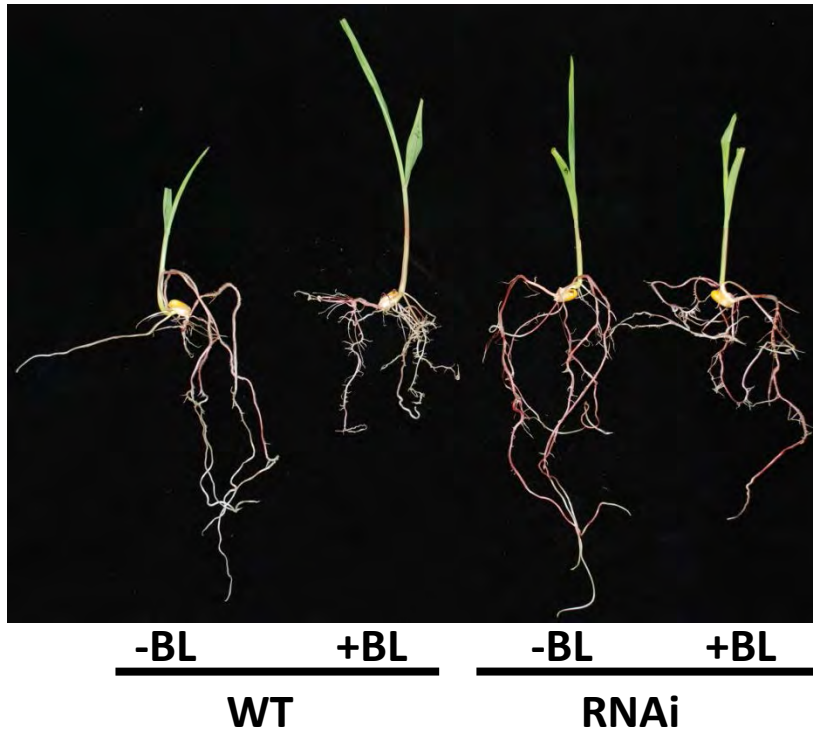

**Supplemental Figure S5.** BR root growth assay. RNAi lines have decreased BR sensitivity compared to WT siblings. 100nM BL treated WT seedlings' primary root length was ~40% decreased compared to untreated WTs, while primary root length of BL treated RNAi plants is 20% decreased compared to untreated RNAi seedlings.

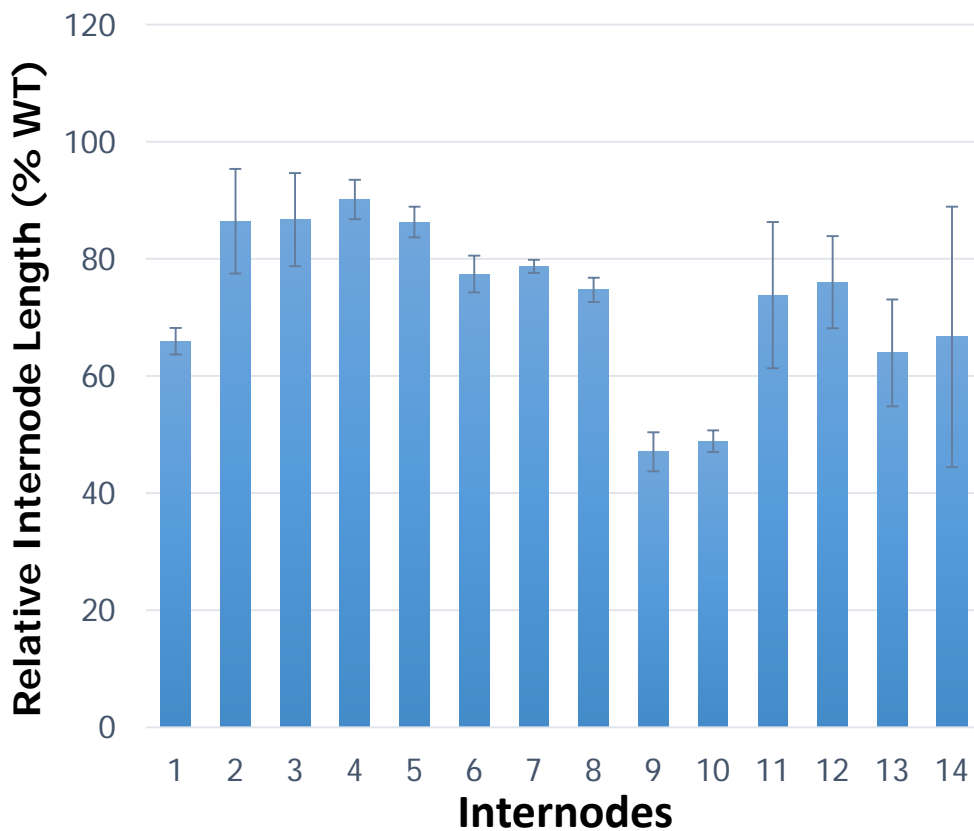

**Supplemental Figure S6.** Internode length of mild *bri1*-RNAi plants. Bars show proportional internode length of the mild *bri1*-RNAi plants as a percentage of the corresponding internode in non-transgenic siblings. There is a fairly uniform decrease over all internodes in RNAi lines, except a more pronounced shortening of internodes 9 and 10 just past the ear node.

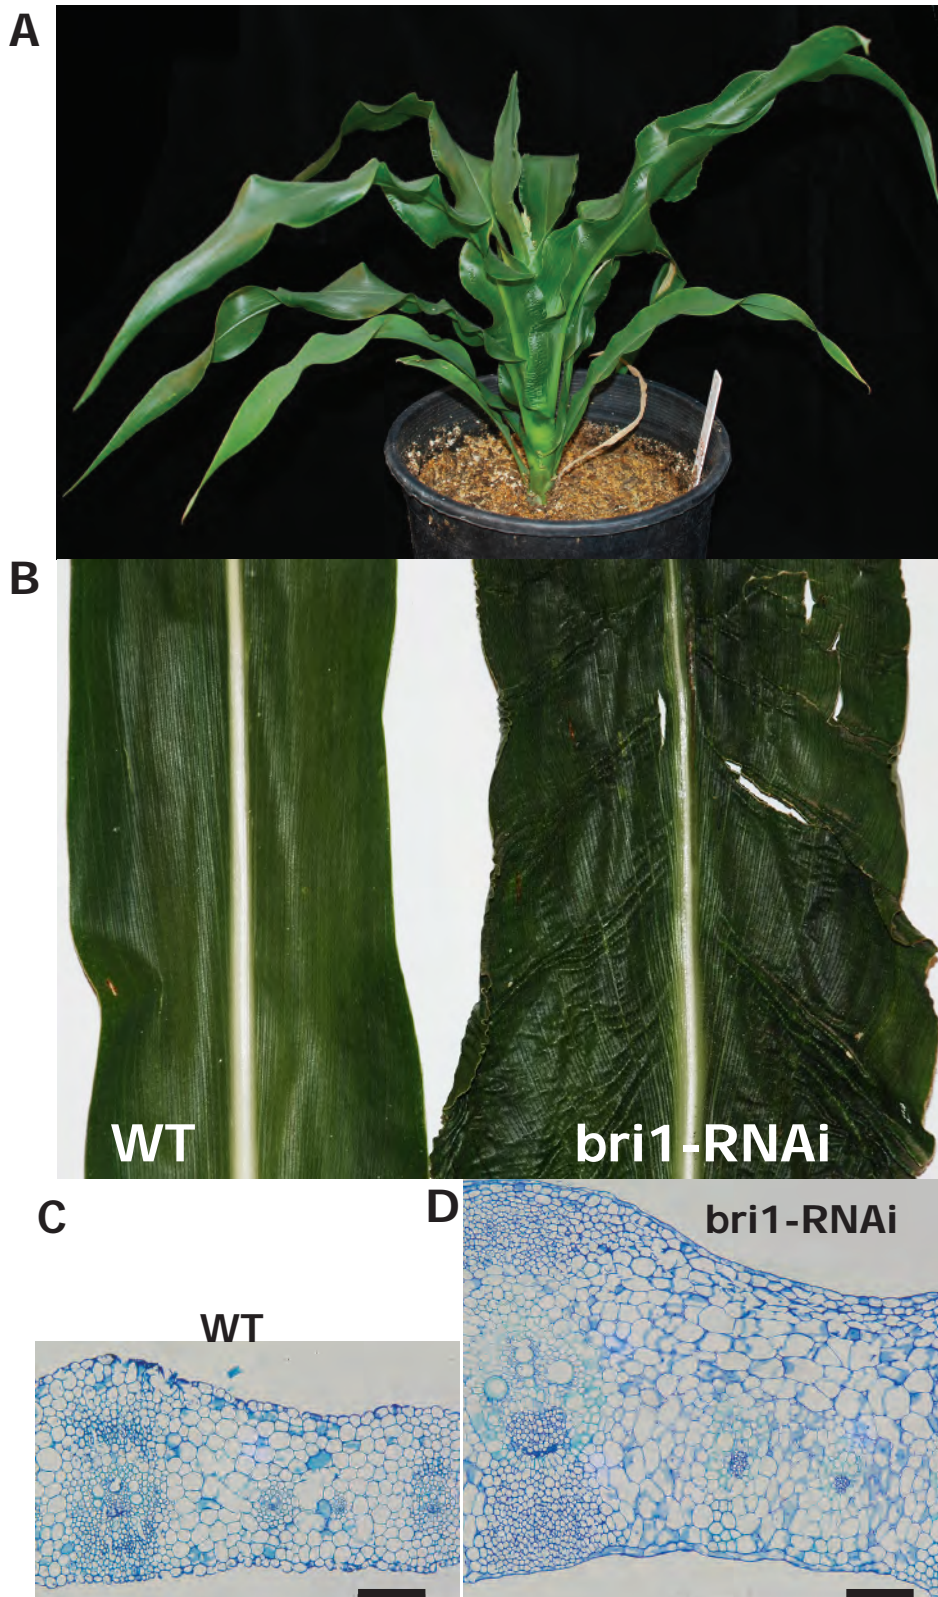

**Supplemental Figure S7.** Leaf traits of *bri1*-RNAi plants. A, *bri1*-RNAi dwarves show characteristic wavy margins producing the appearance of a corkscrew twist. B, Compared to WT (left), strong *bri1*-RNAi leaves have a wrinkled surface and are dark green in color. C and D, Histological sections through the auricle regions of WT (C) and *bri1*-RNAi (D) leaves. RNAi leaves do not show normal auricle anatomy, with thickened tissue, enlarged vascular bundles and enlarged cortical parenchyma (size bar 100  $\mu$ m).

**Table S1.** Fluorescence intensity of nuclei in the auricle bands of WT vs. *zmbri1*-RNAi leaves.

| Expt | CTCF (+/- SE)   |                | T-test      |
|------|-----------------|----------------|-------------|
|      | WT              | bri1-RNAi      |             |
| 1    | 8666.9 (369.0)  | 6949.1 (246.6) | 9.70195E-05 |
| 2    | 10131.7 (327.5) | 8332.2 (302.6) | 4.85517E-05 |
| 3    | 1529.7 (90.0)   | 805.9 (46.2)   | 1.13561E-09 |

**Table S2.** Primers and sequences used

| <b>Primers used for constructing transgenic lines</b> |               |                                                        |
|-------------------------------------------------------|---------------|--------------------------------------------------------|
| <u>Construct</u>                                      | <u>Primer</u> | <u>Sequence (5'-3')</u>                                |
| <i>bri1</i> -RNAi-sense fragment                      | XmaIBRI-F     | ATTCCCGGGTGGACCTCTCCGGGAACAAGAT                        |
| <i>bri1</i> -RNAi-sense fragment                      | SpeIBRI-R     | CGGACTAGTTGGTGCAGTTGGAGATTGAC                          |
| <i>bri1</i> -RNAi-anti sense fragment                 | AVRIIBR-F     | ATGCCTAGGTGGACCTCTCCGGGAACAAGAT                        |
| <i>bri1</i> -RNAi- anti sense fragment                | ASCIBR-R      | TAAGGCGCGCCTGGTGCAGTTGGAGATTGAC                        |
| BES1-YFP - promoter&genomic coding sequence-          | BES1_3GW p1   | GGGGACAAGTTTGTACAAAAAAGCAGGCTGCATTG<br>ATGCTATCGGAGAT  |
| BES1-YFP - promoter&genomic coding sequence-          | BES1_3GW p4   | GGGGACAAGTTTGTATAGAAAAGTTGGGTGCTTGG<br>CGCCGACGCCGA    |
| BES1YFP-native terminator                             | BES1_3GW p3   | GGGGACAAGTTTGTATAATAAAGTTGAGTGAAGCG<br>ATTGGCAGCAA     |
| BES1-YFP-native terminator                            | BES1_3GW p2   | GGGGACCACTTTGTACAAGAAAGCTGGGTACGTTT<br>GTTCCATCTCCTCTC |
| <b>Primers used for genotyping transgenic lines</b>   |               |                                                        |
| <i>bri1</i> -RNAi                                     | Waxy-gk1      | CCAGTTCAAATTCTTTTAGGCTCACC                             |
|                                                       | Mu278-F       | GAACAACCTACCTCTCCGGCG                                  |
| BES1-YFP                                              | Bes1yfp-F2    | TGGATCAGCTTCCAGGCCACCA                                 |
|                                                       | Bes1yfp-R     | GAAGAAGTCGTGCTGCTTCATGTG                               |
| <b>Primers used for Quantitative PCR</b>              |               |                                                        |
| Gene / Accession #                                    | Primer        | Sequence (5'-3')                                       |
| BRI1a / XM_008658585                                  | qbri1-F       | TCGTCACACTTTAGTAAGAGCTG                                |
|                                                       | qbri1-R       | CGTTGGTCAAAGCAAGGTA                                    |
| BRI1b / KP099562                                      | qbri1-5F      | AGCTCCGGGACCTCATTCTT                                   |
|                                                       | qbri1-5R      | AGAGTTCCGACGGGATGATG                                   |
| BRL1 / XM_008654300                                   | qbri1L-F      | GATAGACGAATCGGCAGAGAAA                                 |
|                                                       | qbri1L-R      | GCTAGCTGCTGTTGTATCGTAC                                 |
| BRL2 / XM_008660956                                   | qbri1L2-F     | CCTCTGCCTGTGACTGATG                                    |
|                                                       | qbri1L2-R     | ATTAGTACAGAATTACGGACCAGG                               |
| BRL3 / XR_565429                                      | qbri1L3-F     | AATGTTTCAGTGAGTTTCAGATTGAC                             |
|                                                       | qbri1L3-R     | CTGCAGGGATCAATAACATTTACAC                              |
| CPD / NM_001147124                                    | qcpd-F        | GATAGAGTAAGGTGGATGTCGTG                                |
|                                                       | qcpd-R        | GTCCAGGTTACAGAGCAAGAG                                  |
| BRD1 / NM_001138467                                   | qbrd1-F       | GAAATAACCCATGCGATGCTG                                  |
|                                                       | qbrd1-R       | ACATTACTATCGGCATGGACAC                                 |
| DWF4 / XM_008669815                                   | qdwf4-F:      | TTTGACCGAGAGCACAAGAG                                   |
|                                                       | qdwf4-R:      | CAATCTACATAAAACACGAGACCAC                              |

|                                                                       |                                                                                                                             |                          |
|-----------------------------------------------------------------------|-----------------------------------------------------------------------------------------------------------------------------|--------------------------|
| BAS1 /<br>XM_008647147                                                | qbas1-F                                                                                                                     | TAACTTTCTGTCCTAGCCTGCG   |
|                                                                       | qbas1-R                                                                                                                     | CACATACCACACAAACGCCA     |
| BAS2 /<br>NM_001159622                                                | qbas2-F                                                                                                                     | GACCGGAGCAGAGTTTTGGA     |
|                                                                       | qbas2-R                                                                                                                     | CAATCAATCCCATCTATACTGCCA |
| BAS3 /<br>XM_008674900                                                | qbas3-F                                                                                                                     | ACTAGAAGGAGCACCACCGT     |
|                                                                       | qbas3-R                                                                                                                     | GGCACTGGTCAAGCCTTCT      |
| RS1 /<br>NM_001111861                                                 | qcpd-F                                                                                                                      | CACTTCCATGGACACGACTG     |
|                                                                       | qcpd-R                                                                                                                      | CCACAACAATGTCCTTGCAC     |
| Ubiquitin /<br>XM_008681532                                           | q378-F                                                                                                                      | AACATCCTAACCCAGCTCAAG    |
|                                                                       | q378-R                                                                                                                      | CTGTTGGATCCCATGACGG      |
| <b>Primers&amp;sequences used for cloning and sequencing of BRI1b</b> |                                                                                                                             |                          |
| Primer                                                                | Sequence (5'-3')                                                                                                            |                          |
| Kinase5-R                                                             | TTGCTTGACTTCATGTCTCGGTG                                                                                                     |                          |
| Chr5-R1                                                               | CTAGTCCTTCTCCTCCTTGTCTTCTTTTCAGGGTCG                                                                                        |                          |
| Chr5-R2                                                               | CTAGTCCTTCTCCTCCTTGTCTTCTTTTCAGGGTCC                                                                                        |                          |
| Chr5-R3                                                               | CTAGTCCTTCTCCTCCTTGTCTTCTTTTCAGGGTCA                                                                                        |                          |
| Chr5-R4                                                               | CTAGTCCTTCTCCTCCTTGTCTTCTTTTCAGGGTCT                                                                                        |                          |
| Chr5W-F7                                                              | CTCGAGACGCTCAGCCTG                                                                                                          |                          |
| Chr5W-F8                                                              | TGCAGCTGAGCAGCCTC                                                                                                           |                          |
| Chr5-N1                                                               | TTTCTTCTGCTCCTCTCTCTAGGT                                                                                                    |                          |
| Chr5-UR                                                               | GTGGATTTGGCACCGAAGAAAAAAT                                                                                                   |                          |
| Sequence-#1                                                           | TGAACTCGTGAAGGAAGATCCAGCCCTGGAGCTCGAG<br>CTACTGGAGCACCTAAAA                                                                 |                          |
| Sequence-#2                                                           | AGAGGCTCAGCCTGCGCGGGCGCCAACGTCAGCGGCACGC<br>TGGCCGCGGTGCCGAGGTGCGGGGCAAGCTGCAGTCGC<br>TCGACCTGTCAGCGAATGCCGGCCTGCGGGGCTCCGT |                          |
|                                                                       |                                                                                                                             |                          |
